# Supplementary material for: Reliable Diagnostic Tests and Thresholds for Preoperative Diagnosis of Non‐Inflammatory Arthritis Periprosthetic Joint Infection: A Meta‐analysis and Systematic Review
Source: PubMed Central journal article supplement (PMC9627080; doi:10.1111/os.13500), 2022-10-01
Supplement: OS-14-2822-s004.pdf [file OS-14-2822-s004.pdf]

**Appendix S3:** Subgroup analysis of chronic PJI without IA population

|                   | <b>Studies Number</b> | <b>SEN (95% CI)</b> | <b>SPE (95% CI)</b> | <b>AUC (95% CI)</b> | <b>PLR (95% CI)</b> | <b>NLR (95% CI)</b> | <b>DOR (95% CI)</b> | <b>I<sup>2</sup> (p value)</b> |
|-------------------|-----------------------|---------------------|---------------------|---------------------|---------------------|---------------------|---------------------|--------------------------------|
| <b>PMN (%)</b>    |                       |                     |                     |                     |                     |                     |                     |                                |
| 60-65             | 5                     | 0.89 (0.82,0.94)    | 0.89 (0.81,0.93)    | 0.95 (0.93,0.96)    | 7.8 (4.5,13.6)      | 0.12 (0.07,0.22)    | 64 (22,186)         | 0% (p=0.451)                   |
| 65-70             | 11                    | 0.90 (0.85,0.93)    | 0.84 (0.75,0.90)    | 0.94 (0.91,0.95)    | 5.7 (3.5,9.2)       | 0.12 (0.08,0.18)    | 47 (23,97)          | 96% (p<0.001)                  |
| 70-75             | 10                    | 0.89 (0.84,0.92)    | 0.90 (0.86,0.93)    | 0.95 (0.93,0.97)    | 9.1 (6.5,12.8)      | 0.12 (0.09,0.17)    | 74 (45,124)         | 80% (p=0.003)                  |
| 75-80             | 7                     | 0.92 (0.85,0.96)    | 0.81 (0.73,0.88)    | 0.94 (0.91,0.95)    | 4.9 (3.2,7.6)       | 0.09 (0.05,0.19)    | 52 (19,146)         | 0% (p=0.212)                   |
| 80                | 16                    | 0.84 (0.80,0.88)    | 0.94 (0.90,0.97)    | 0.93 (0.90,0.95)    | 14.6 (8.4,25.4)     | 0.17 (0.13,0.21)    | 88 (50,155)         | 98% (p<0.001)                  |
| <b>sWBC (μL)</b>  |                       |                     |                     |                     |                     |                     |                     |                                |
| 1000-2000         | 12                    | 0.91 (0.83,0.95)    | 0.89 (0.81,0.94)    | 0.95 (0.91,0.97)    | 8.1 (4.6,14.4)      | 0.11 (0.06,0.19)    | 76 (33,175)         | 96% (p<0.001)                  |
| 2000-3000         | 8                     | 0.85 (0.81,0.89)    | 0.88 (0.81,0.93)    | 0.89 (0.86,0.93)    | 7.1 (4.4,11.6)      | 0.17 (0.13,0.21)    | 43 (25,74)          | 90% (p<0.001)                  |
| 3000              | 19                    | 0.88 (0.85,0.90)    | 0.92 (0.88,0.95)    | 0.94 (0.91,0.96)    | 11.1 (7.2,17.2)     | 0.13 (0.11,0.17)    | 83 (47,145)         | 97% (p<0.001)                  |
| 3000-4000         | 6                     | 0.90 (0.88,0.91)    | 0.91 (0.89,0.92)    | 0.96 (0.94,0.97)    | 9.9 (8.3,11.9)      | 0.11 (0.09,0.14)    | 89 (63,126)         | 89% (p=0.483)                  |
| 4000-4500         | 2                     | 0.91 (0.86,0.94)    | 0.98 (0.97,0.99)    | 0.96 (0.95,0.94)    | 50.3 (31.1,81.4)    | 0.09 (0.06,0.14)    | 540 (282,1037)      | 0% (p=0.498)                   |
| <b>CRP (mg/L)</b> |                       |                     |                     |                     |                     |                     |                     |                                |
| <10               | 31                    | 0.81 (0.77,0.85)    | 0.78 (0.74,0.81)    | 0.86 (0.83,0.89)    | 3.7 (3.1,4.2)       | 0.24 (0.19,0.30)    | 15 (11,21)          | 98% (p<0.001)                  |
| 10                | 56                    | 0.81 (0.77,0.85)    | 0.78 (0.74,0.82)    | 0.87 (0.83,0.89)    | 3.7 (3.2,4.4)       | 0.24 (0.20,0.29)    | 16 (12,20)          | 100% (p<0.001)                 |
| 10-13             | 12                    | 0.83 (0.77,0.88)    | 0.78 (0.70,0.84)    | 0.88 (0.84,0.90)    | 3.8 (2.7,5.2)       | 0.22 (0.16,0.30)    | 17 (10,29)          | 93% (p<0.001)                  |
| 13-15             | 6                     | 0.84 (0.78,0.89)    | 0.83 (0.73,0.89)    | 0.90 (0.87,0.92)    | 4.8 (3.1,7.6)       | 0.19 (0.13,0.27)    | 26 (14,46)          | 86% (p<0.001)                  |
| 15-20             | 7                     | 0.82 (0.73,0.89)    | 0.83 (0.79,0.86)    | 0.86 (0.83,0.89)    | 4.7 (3.7,6.0)       | 0.22(0.13,0.35)     | 22 (11,43)          | 44% (p=0.084)                  |
| 20-25             | 6                     | 0.71 (0.47,0.87)    | 0.69 (0.29,0.92)    | 0.75 (0.72,0.80)    | 2.2 (0.8,6.7)       | 0.43 (0.20,0.90)    | 5 (1,28)            | 99% (p<0.001)                  |
| 25-35             | 2                     | 0.86 (0.12,1.00)    | 0.95 (0.91,0.97)    | 0.96 (0.92,1.00)    | 17.5 (6.5,46.8)     | 0.15 (0.01,3.93)    | 117 (2,7229)        | 76% (p=0.008)                  |
| <b>ESR (mm/h)</b> |                       |                     |                     |                     |                     |                     |                     |                                |
| 20-25             | 7                     | 0.85 (0.78,0.90)    | 0.79 (0.65,0.88)    | 0.89 (0.86,0.92)    | 4.1 (2.5,6.7)       | 0.19 (0.13,0.27)    | 22 (13,37)          | 90% (p<0.001)                  |
| 25-30             | 7                     | 0.73 (0.65,0.80)    | 0.82 (0.74,0.88)    | 0.82 (0.79,0.85)    | 4.2 (2.9,6.0)       | 0.33 (0.26,0.41)    | 13 (9,19)           | 92% (p<0.001)                  |

|       |    |                  |                  |                  |               |                  |            |                |
|-------|----|------------------|------------------|------------------|---------------|------------------|------------|----------------|
| 30    | 47 | 0.79 (0.74,0.83) | 0.78 (0.72,0.83) | 0.85 (0.82,0.88) | 3.5 (2.8,4.4) | 0.27 (0.22,0.33) | 13 (10,18) | 100% (p<0.001) |
| 30-40 | 15 | 0.77 (0.69,0.84) | 0.78 (0.72,0.83) | 0.84 (0.81,0.87) | 3.5 (2.7,4.5) | 0.29 (0.21,0.40) | 12 (7,20)  | 96% (p<0.001)  |
| 40-50 | 14 | 0.68 (0.61,0.75) | 0.79 (0.74,0.84) | 0.81 (0.77,0.84) | 3.3 (2.6,4.2) | 0.40 (0.32,0.50) | 8 (5,13)   | 97% (p<0.001)  |

IA: Inflammatory Arthritis; SEN: sensitivity; SPE: specificity; AUC: area under the ROC curve; PLR: positive likelihood ratio; NLR: negative likelihood ratio; DOR: diagnostic odds ratio; PMN%: proportion of neutrophils in synovial fluid; sWBC: synovial WBC.
