# Supplementary material for: Reliable Diagnostic Tests and Thresholds for Preoperative Diagnosis of Non‐Inflammatory Arthritis Periprosthetic Joint Infection: A Meta‐analysis and Systematic Review
Source: PubMed Central journal article supplement (PMC9627080; doi:10.1111/os.13500), 2022-10-01
Supplement: OS-14-2822-s008.pdf [file OS-14-2822-s008.pdf]

**Appendix S5:** Hierarchical analysis of thresholds with MSIS criteria as gold standard (chronic PJI without IA population)

|                   | <b>Studies<br/>Number</b> | <b>SEN (95% CI)</b> | <b>SPE (95% CI)</b> | <b>AUC (95% CI)</b> | <b>PLR (95% CI)</b> | <b>NLR (95% CI)</b> | <b>DOR (95% CI)</b> | <b>I<sup>2</sup> (p value)</b> |
|-------------------|---------------------------|---------------------|---------------------|---------------------|---------------------|---------------------|---------------------|--------------------------------|
| <b>PMN (%)</b>    |                           |                     |                     |                     |                     |                     |                     |                                |
| <70               | 9                         | 0.86 (0.82,0.90)    | 0.82(0.78,0.85)     | 0.90 (0.87,0.93)    | 4.8 (3.9,6.0)       | 0.17 (0.12,0.23)    | 29 (18,47)          | 0% (p=0.408)                   |
| 72.5 (70-75)      | 2                         | 0.96 (0.74,1.00)    | 0.87 (0.82,0.91)    | 0.92 (0.91,0.98)    | 7.5 (5.5,10.2)      | 0.04 (0.00,0.36)    | 178 (22,1418)       | 72% (p=0.130)                  |
| ≥75               | 17                        | 0.86 (0.82,0.89)    | 0.92 (0.86,0.95)    | 0.92 (0.89,0.94)    | 10.3 (6.1,17.4)     | 0.15 (0.12,0.19)    | 67 (37,121)         | 98% (p<0.001)                  |
| <b>sWBC (μL)</b>  |                           |                     |                     |                     |                     |                     |                     |                                |
| <4000             | 25                        | 0.86 (0.84,0.88)    | 0.90 (0.86,0.92)    | 0.92 (0.89,0.94)    | 8.4 (6.3,11.1)      | 0.15 (0.13,0.18)    | 55 (38,79)          | 97% (p<0.001)                  |
| 3966              | 1                         | 0.90                | 0.91                | -                   | -                   | -                   | -                   | -                              |
| ≥4500             | 2                         | 0.81                | 0.95                | -                   | -                   | -                   | -                   | -                              |
| <b>CRP (mg/L)</b> |                           |                     |                     |                     |                     |                     |                     |                                |
| <11               | 47                        | 0.83 (0.81,0.86)    | 0.78 (0.75,0.81)    | 0.88 (0.85,0.91)    | 3.9 (3.4,4.4)       | 0.21 (0.18,0.24)    | 18 (15,23)          | 99% (p<0.001)                  |
| 13.5 (11-15)      | 12                        | 0.86 (0.82,0.89)    | 0.80 (0.71,0.87)    | 0.90 (0.87,0.92)    | 4.3 (2.9,6.4)       | 0.17(0.14,0.22)     | 25 (16,39)          | 96% (p<0.001)                  |
| >15               | 3                         | 0.75 (0.54,0.88)    | 0.88 (0.10,1.00)    | 0.81 (0.70,0.90)    | 6.1 (0.2,248.0)     | 0.29(0.12,0.71)     | 21 (0,1683)         | 99% (p<0.001)                  |
| <b>ESR (mm/h)</b> |                           |                     |                     |                     |                     |                     |                     |                                |
| <30               | 10                        | 0.80 (0.71,0.87)    | 0.82 (0.75,0.87)    | 0.88 (0.85,0.90)    | 4.4 (3.4,5.5)       | 0.24 (0.17,0.35)    | 18 (13,24)          | 97% (p<0.001)                  |
| 30                | 25                        | 0.79 (0.72,0.84)    | 0.79 (0.75,0.83)    | 0.86 (0.82,0.89)    | 3.8 (3.2,4.5)       | 0.27 (0.20,0.34)    | 14 (11,19)          | 99% (p<0.001)                  |
| >30               | 17                        | 0.75 (0.69,0.80)    | 0.82 (0.78,0.86)    | 0.86 (0.83,0.89)    | 4.3 (3.3,5.4)       | 0.31 (0.24,0.39)    | 14 (9,22)           | 96% (p<0.001)                  |

IA: Inflammatory Arthritis; SEN: sensitivity; SPE: specificity; AUC: area under the ROC curve; PLR: positive likelihood ratio; NLR: negative likelihood ratio; DOR: diagnostic odds ratio; PMN%: proportion of neutrophils in synovial fluid; sWBC: synovial WBC.
