# Supplementary material for: Reliable Diagnostic Tests and Thresholds for Preoperative Diagnosis of Non‐Inflammatory Arthritis Periprosthetic Joint Infection: A Meta‐analysis and Systematic Review
Source: PubMed Central journal article supplement (PMC9627080; doi:10.1111/os.13500), 2022-10-01
Supplement: OS-14-2822-s016.pdf [file OS-14-2822-s016.pdf]

**Appendix S4: Hierarchical analysis of thresholds (chronic PJI without IA population)**

|                   | <b>Studies<br/>Number</b> | <b>SEN (95% CI)</b> | <b>SPE (95% CI)</b> | <b>AUC (95% CI)</b> | <b>PLR (95% CI)</b> | <b>NLR (95% CI)</b> | <b>DOR (95% CI)</b> | <b>I<sup>2</sup> (p value)</b> |
|-------------------|---------------------------|---------------------|---------------------|---------------------|---------------------|---------------------|---------------------|--------------------------------|
| <b>PMN (%)</b>    |                           |                     |                     |                     |                     |                     |                     |                                |
| <70               | 17                        | 0.87 (0.82,0.91)    | 0.82(0.75,0.88)     | 0.92 (0.89,0.94)    | 4.9 (3.3,7.2)       | 0.16 (0.11,0.23)    | 31 (15,61)          | 96% (p<0.001)                  |
| 72.5 (70-75)      | 11                        | 0.89 (0.84,0.92)    | 0.90 (0.86,0.93)    | 0.95 (0.93,0.97)    | 9.1 (6.5,12.8)      | 0.12 (0.09,0.17)    | 74 (45,124)         | 80% (p=0.003)                  |
| ≥75               | 25                        | 0.87 (0.83,0.90)    | 0.92 (0.88,0.95)    | 0.94 (0.92,0.96)    | 10.9 (6.9,17.1)     | 0.14 (0.11,0.18)    | 76 (46,125)         | 99% (p<0.001)                  |
| <b>sWBC (μL)</b>  |                           |                     |                     |                     |                     |                     |                     |                                |
| <4000             | 44                        | 0.88 (0.84,0.90)    | 0.90 (0.86,0.92)    | 0.95 (0.92,0.96)    | 8.4 (6.4,11.1)      | 0.14 (0.11,0.18)    | 60 (40,91)          | 99% (p<0.001)                  |
| 4100 (4100-4450)  | 2                         | 0.91 (0.86,0.94)    | 0.98 (0.97,0.99)    | 0.96 (0.95,0.94)    | 50.3 (31.1,81.4)    | 0.09 (0.06,0.14)    | 540 (282,1037)      | 0% (p=0.498)                   |
| ≥4500             | 3                         | 0.60 (0.01,1.00)    | 0.87 (0.76,0.94)    | 0.88 (0.80,0.94)    | 4.8 (0.5,45.3)      | 0.45 (0.02,12.0)    | 11 (0,2492)         | 95% (p<0.001)                  |
| <b>CRP (mg/L)</b> |                           |                     |                     |                     |                     |                     |                     |                                |
| ≤13               | 96                        | 0.82 (0.79,0.84)    | 0.78 (0.75,0.80)    | 0.87 (0.83,0.89)    | 3.7 (3.3,4.1)       | 0.23 (0.21,0.27)    | 16 (13,19)          | 100% (p<0.001)                 |
| 13.5 (13-14)      | 3                         | 0.88 (0.85,0.91)    | 0.86 (0.84,0.88)    | 0.94 (0.90,0.96)    | 6.3 (5.5,7.3)       | 0.14 (0.10,0.18)    | 47 (33,67)          | 0% (p=0.499)                   |
| >14               | 22                        | 0.79 (0.70,0.86)    | 0.82 (0.72,0.89)    | 0.87 (0.84,0.90)    | 4.4 (2.7,7.1)       | 0.26 (0.17,0.38)    | 17 (8,36)           | 100% (p<0.001)                 |
| <b>ESR (mm/h)</b> |                           |                     |                     |                     |                     |                     |                     |                                |
| <30               | 17                        | 0.83 (0.78,0.87)    | 0.78 (0.72,0.82)    | 0.88 (0.84,0.90)    | 3.7 (3.0,4.6)       | 0.22 (0.17,0.28)    | 17 (13,22)          | 98% (p<0.001)                  |
| 30                | 48                        | 0.79 (0.74,0.83)    | 0.78 (0.72,0.83)    | 0.85 (0.82,0.88)    | 3.5 (2.8,4.4)       | 0.27 (0.22,0.33)    | 13 (10,18)          | 100% (p<0.001)                 |
| >30               | 30                        | 0.74 (0.68,0.79)    | 0.79 (0.75,0.83)    | 0.84 (0.80,0.87)    | 3.6 (2.9,4.3)       | 0.33 (0.27,0.41)    | 11 (7,16)           | 99% (p<0.001)                  |

IA: Inflammatory Arthritis; SEN: sensitivity; SPE: specificity; AUC: area under the ROC curve; PLR: positive likelihood ratio; NLR: negative likelihood ratio; DOR: diagnostic odds ratio; PMN%: proportion of neutrophils in synovial fluid; sWBC: synovial WBC.
