# Supplementary material for: Reliable Diagnostic Tests and Thresholds for Preoperative Diagnosis of Non‐Inflammatory Arthritis Periprosthetic Joint Infection: A Meta‐analysis and Systematic Review
Source: PubMed Central journal article supplement (PMC9627080; doi:10.1111/os.13500), 2022-10-01
Supplement: OS-14-2822-s022.pdf [file OS-14-2822-s022.pdf]

### Supplementary Figures 3: Calprotectin

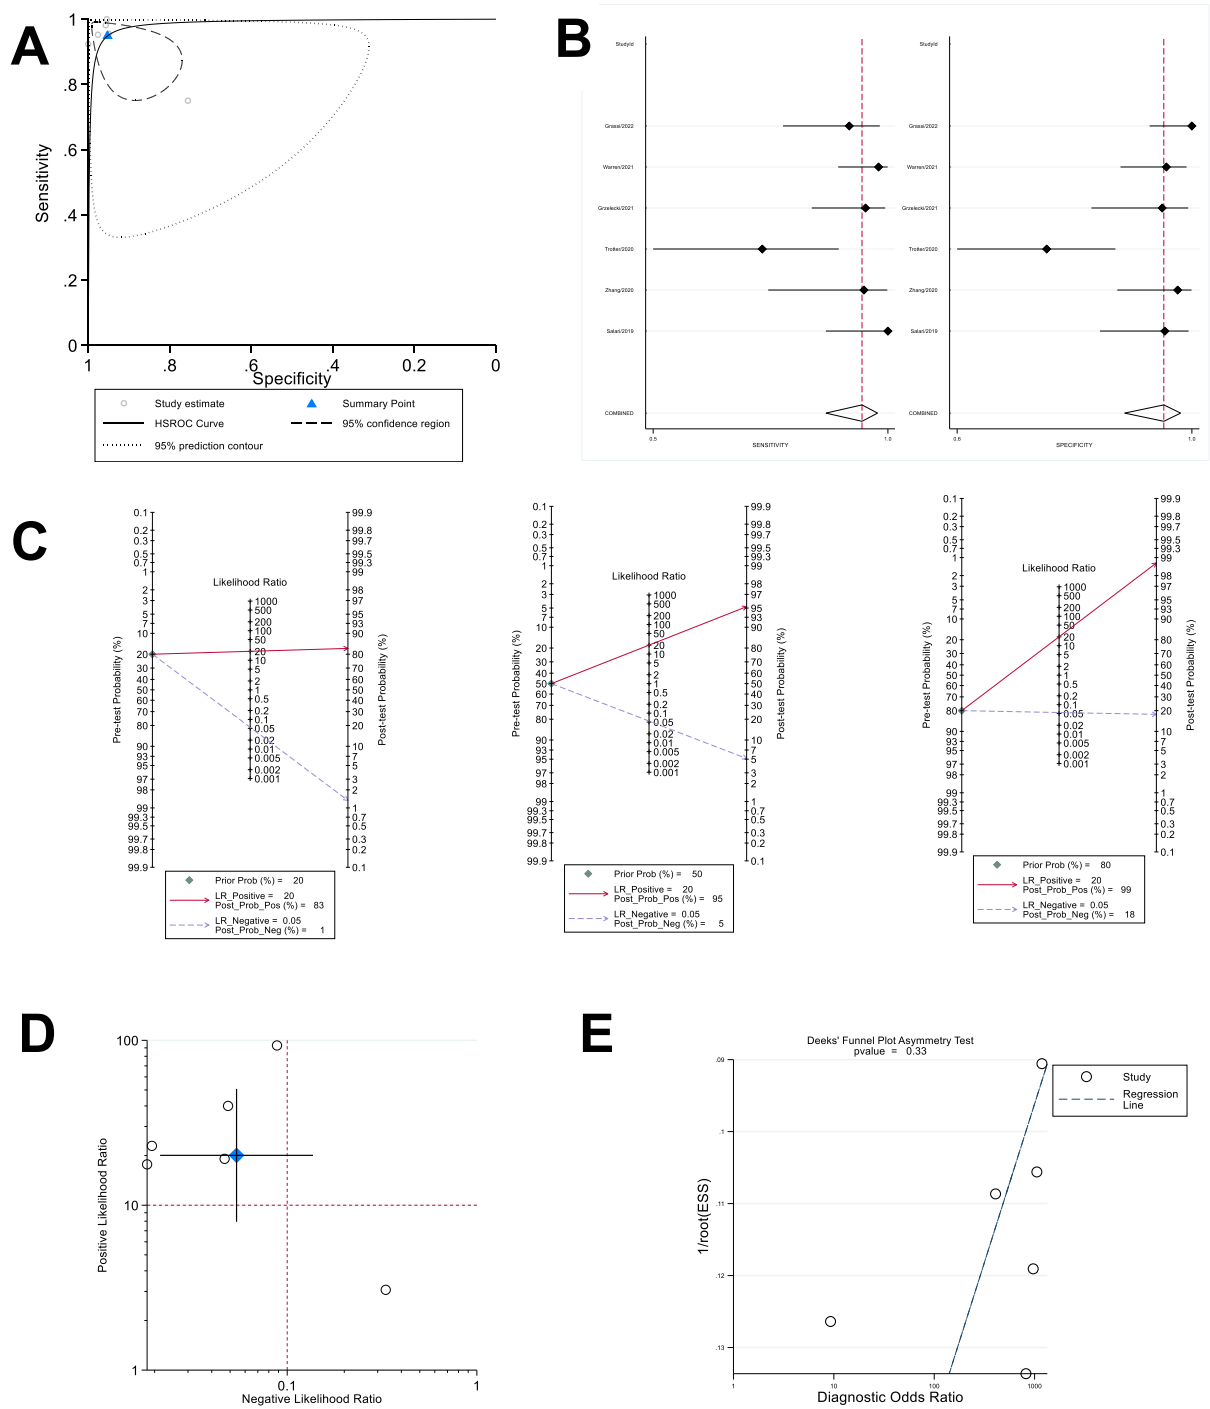

A: HSROC gram; B: Forest gram; C: Fagan's grams for low clinical suspicion of PJI (20%), low clinical suspicion of PJI (50%), and high clinical suspicion of PJI (80%); D: Likelihood Matrix gram; E: Linear regression test of funnel plot asymmetry.
