# Supplementary material for: Reliable Diagnostic Tests and Thresholds for Preoperative Diagnosis of Non‐Inflammatory Arthritis Periprosthetic Joint Infection: A Meta‐analysis and Systematic Review
Source: PubMed Central journal article supplement (PMC9627080; doi:10.1111/os.13500), 2022-10-01
Supplement: OS-14-2822-s023.pdf [file OS-14-2822-s023.pdf]

**Appendix S1:** Systematic review search strategy.

| Database | Step | Terms                                                                                                                                                                                                                                                                                                                                                                                                                                    | Results*      |
|----------|------|------------------------------------------------------------------------------------------------------------------------------------------------------------------------------------------------------------------------------------------------------------------------------------------------------------------------------------------------------------------------------------------------------------------------------------------|---------------|
| Pubmed   | 1    | (((((((((“Infections” [Mesh]) OR “Arthroplasty” [Mesh]) Periprosthetic Joint Infection[Title/Abstract]) OR Prosthesis Related Infections[Title/Abstract]) OR Joint Replacement Infection[Title/Abstract]) OR infection[Title/Abstract]) OR septic arthritis[Title/Abstract]) OR knee arthroplasty[Title/Abstract]) OR hip arthroplasty[Title/Abstract])                                                                                  | 1338473       |
|          | 2    | (((((((((“Diagnosis” [Mesh]) OR “Sensitivity and Specificity” [Mesh]) OR "ROC Curve"[Mesh]) OR diagnostic accuracy[Title/Abstract]) OR diagnostic test[Title/Abstract]) OR diagnostic procedure[Title/Abstract]) OR receiver operating characteristic[Title/Abstract]) OR ROC[Title/Abstract]) OR true positive[Title/Abstract]) OR true negative[Title/Abstract]) OR false positive[Title/Abstract]) OR false negative[Title/Abstract]) | 9424249       |
|          | 3    | ((((((“Serum” [Mesh]) OR “Synovial fluid” [Mesh]) OR “Clinical Laboratory Techniques” [Mesh]) OR fine needle aspiration [Title/Abstract]) OR aspiration culture[Title/Abstract]) OR culture[Title/Abstract])                                                                                                                                                                                                                             | 3295482       |
|          | 4    | "2000/01/01"[PDat]: "2022/06/30"[PDat]                                                                                                                                                                                                                                                                                                                                                                                                   |               |
|          | 5    | English [lang]                                                                                                                                                                                                                                                                                                                                                                                                                           |               |
|          | 6    | Human [Mesh]                                                                                                                                                                                                                                                                                                                                                                                                                             |               |
|          | 7    | #1 AND #2 AND #3 AND #4 AND #5 AND #6                                                                                                                                                                                                                                                                                                                                                                                                    | <b>140684</b> |
| Embase   | 1    | ('periprosthetic joint infection'/exp OR 'periprosthetic joint infection' OR 'infection'/exp OR 'infection' OR 'replacement arthroplasty'/exp OR 'replacement arthroplasty' OR 'prosthesis related infections.ab.' OR 'joint replacement infection.ab.' OR 'knee arthroplasty.ab.' OR 'hip arthroplasty.ab.' OR 'septic arthritis.ab.') AND [embase]/lim                                                                                 | 3607492       |
|          | 2    | ('diagnosis'/exp OR 'diagnostic accuracy'/exp OR 'diagnostic error'/exp OR 'sensitivity and specificity'/exp OR 'receiver operating characteristic'/exp OR 'roc.ab.' OR 'diagnostic test.ab.' OR 'true positive.ab.' OR 'true negative.ab.' OR 'false positive.ab.' OR 'false negative.ab.') AND [embase]/lim                                                                                                                            | 6663869       |
|          | 3    | ('serum'/exp OR 'synovial fluid'/exp OR 'joint biopsy'/exp OR 'Laboratory test.ab.' OR 'biological marker'/exp OR 'aspiration culture.ab.' OR 'culture.ab.') AND [embase]/lim                                                                                                                                                                                                                                                            | 539667        |

4 [1-1-2000]/sd NOT [30-06-2022]/sd  
5 [english]/lim  
6 [human]/lim  
7 (#1 AND #2 AND #3 AND #4 AND #5 AND #6)

**28962**

---

\* Search date: 2022-07-08
