# Supplementary material for: Reliable Diagnostic Tests and Thresholds for Preoperative Diagnosis of Non‐Inflammatory Arthritis Periprosthetic Joint Infection: A Meta‐analysis and Systematic Review
Source: PubMed Central journal article supplement (PMC9627080; doi:10.1111/os.13500), 2022-10-01
Supplement: OS-14-2822-s027.pdf [file OS-14-2822-s027.pdf]

**Appendix S2:** Information on the 215 studies included.

| Study                          | Year | Country   | Sample<br>Number | Test                                            | Joints   | Reference Standard     | Inflammatory Arthritis |                    | QUADAS-2 Overall<br>Judgement |               |
|--------------------------------|------|-----------|------------------|-------------------------------------------------|----------|------------------------|------------------------|--------------------|-------------------------------|---------------|
|                                |      |           |                  |                                                 |          |                        | Included IA<br>Patents | Patients<br>Number | Risk of<br>Bias               | Applicability |
| Teller et al.                  | 2000 | USA       | 137              | ESR/Aspiration Culture                          | Knee/Hip | Intraoperative Culture | N/A <sup>b</sup>       | N/A <sup>c</sup>   | High                          | Low           |
| Itasaka et al.                 | 2001 | Japan     | 48               | CRP/ESR/WBC/Aspiration Culture                  | Hip      | Compositive Standard   | No                     | 0                  | Unclear                       | Low           |
| Somme et al.                   | 2003 | USA       | 107              | Aspiration Culture                              | Hip      | Intraoperative Culture | Yes                    | N/A                | High                          | Low           |
| Mason et al.                   | 2003 | USA       | 86               | sWBC/PMN                                        | Knee     | Intraoperative Culture | Yes                    | 4                  | High                          | High          |
| Bernard et al.                 | 2004 | France    | 228              | CRP/ESR/WBC/Aspiration Culture                  | Knee/Hip | Intraoperative Culture | N/A                    | N/A                | Unclear                       | Unclear       |
| Malhotra et al.                | 2004 | Australia | 41               | Aspiration Culture                              | Hip      | Intraoperative Culture | Yes                    | N/A                | High                          | High          |
| Williams et al.                | 2004 | UK        | 273              | Aspiration Culture                              | Hip      | Intraoperative Culture | N/A                    | N/A                | Low                           | Unclear       |
| Trampuz et al.                 | 2004 | USA       | 133              | sWBC/PMN                                        | Knee     | Compositive Standard   | No                     | 0                  | High                          | Unclear       |
| Panousis et al.                | 2005 | UK        | 92               | CRP/ESR/Aspiration Culture                      | Knee/Hip | Compositive Standard   | N/A                    | N/A                | High                          | Unclear       |
| Ali et al.                     | 2005 | UK        | 73               | Aspiration Culture                              | Hip      | Intraoperative Culture | N/A                    | N/A                | Unclear                       | Unclear       |
| Di Cesare et al.               | 2005 | Finland   | 58               | CRP/ESR/IL-6/WBC                                | Knee/Hip | Intraoperative Culture | No                     | 0                  | Unclear                       | Unclear       |
| Van den bekerom et al.         | 2006 | Belgium   | 68               | Aspiration Culture                              | Knee     | Compositive Standard   | N/A                    | N/A                | High                          | Unclear       |
| Parvizi et al.                 | 2006 | USA       | 168              | sWBC/PMN                                        | Knee/Hip | Compositive Standard   | No                     | 0                  | High                          | Unclear       |
| Baré et al.                    | 2006 | Canada    | 242              | CRP/ESR                                         | Knee     | Compositive Standard   | N/A                    | N/A                | High                          | Unclear       |
| Della Valle et al.             | 2007 | USA       | 94               | CRP/ESR/sWBC/PMN/Aspiration Culture             | Knee     | Compositive Standard   | N/A                    | N/A                | High                          | Unclear       |
| Trampuz et al.                 | 2007 | USA       | 140              | Aspiration Culture                              | Knee/Hip | Compositive Standard   | N/A                    | N/A                | High                          | Low           |
| Nilsdotter-Augustinsson et al. | 2007 | Sweden    | 124              | CRP/ESR/sWBC/TNF- $\alpha$ /sIL-1 $\beta$ /sIL6 | Hip      | Compositive Standard   | Yes                    | 5                  | High                          | High          |
| Bottner et al.                 | 2007 | Germany   | 78               | CRP/ESR/IL-6/WBC/PCT                            | Knee/Hip | Intraoperative Culture | Yes                    | 5                  | Unclear                       | Unclear       |

|                    |      |         |     |                                          |          |                        |     |     |         |         |
|--------------------|------|---------|-----|------------------------------------------|----------|------------------------|-----|-----|---------|---------|
| Greidanus et al.   | 2007 | Canada  | 151 | CRP/ESR                                  | Knee     | Intraoperative Culture | No  | 0   | High    | Low     |
| Simonsen et al.    | 2007 | Denmark | 76  | CRP/ESR/WBC                              | Hip      | Compositive Standard   | N/A | N/A | High    | Unclear |
| Austin et al.      | 2008 | USA     | 296 | CRP/ESR/IL-6/sWBC/PMN/Aspiration Culture | Knee     | Compositive Standard   | No  | 0   | High    | High    |
| Müller et al.      | 2008 | Germany | 50  | CRP/WBC/Aspiration Culture               | Hip      | Compositive Standard   | N/A | N/A | High    | Unclear |
| Gallo et al.       | 2008 | Czech   | 94  | Aspiration Culture                       | Knee/Hip | Compositive Standard   | N/A | N/A | High    | Unclear |
| Schinsky et al.    | 2008 | USA     | 201 | CRP/ESR/sWBC/PMN                         | Hip      | Compositive Standard   | No  | 0   | High    | Unclear |
| Ghanem et al.      | 2008 | USA     | 128 | sWBC                                     | Knee     | Compositive Standard   | No  | 0   | High    | Low     |
| Ghanem et al.      | 2008 | USA     | 429 | sWBC/PMN                                 | Knee     | Compositive Standard   | No  | 0   | High    | Low     |
| Fink et al.        | 2008 | Germany | 145 | CRP                                      | Knee     | Intraoperative Culture | Yes | 16  | Unclear | Unclear |
| Tohtz et al.       | 2009 | Germany | 64  | CRP/ESR/WBC/Aspiration Culture           | Hip      | Compositive Standard   | N/A | N/A | High    | Unclear |
| Chevillotte et al. | 2009 | USA     | 204 | CRP/ESR/WBC                              | Hip      | Intraoperative Culture | Yes | 29  | High    | Unclear |
| Ghanem et al.      | 2009 | USA     | 479 | CRP/ESR                                  | Hip      | Compositive Standard   | No  | 0   | High    | Unclear |
| Morgan et al.      | 2009 | USA     | 903 | CRP/ESR/WBC                              | Knee     | Compositive Standard   | N/A | N/A | High    | Unclear |
| Meermans et al.    | 2010 | UK      | 120 | Aspiration Culture                       | Knee/Hip | Intraoperative Culture | N/A | N/A | Unclear | Unclear |
| Deirmengian et al. | 2010 | USA     | 51  | CRP/ESR/sWBC/PMN/sIL-1 $\beta$           | Knee/Hip | Intraoperative Culture | Yes | N/A | High    | High    |
| Buttaro et al.     | 2010 | Italy   | 69  | CRP/ESR/IL-6                             | Hip      | Intraoperative Culture | No  | 0   | High    | Unclear |
| Piper et al.       | 2010 | USA     | 518 | CRP/ESR                                  | Knee/Hip | Compositive Standard   | No  | 0   | High    | Unclear |
| Worthington et al. | 2010 | UK      | 46  | CRP/ESR/IL-6                             | Hip      | Compositive Standard   | N/A | N/A | High    | Low     |
| Parvizi et al.     | 2011 | USA     | 59  | CRP/sCRP                                 | Knee     | Compositive Standard   | N/A | N/A | High    | Unclear |
| Parvizi et al.     | 2011 | USA     | 108 | LE                                       | Knee     | Compositive Standard   | Yes | 1   | High    | Unclear |
| Jacovides et al.   | 2011 | USA     | 74  | sCRP/sIL-6                               | Knee/Hip | Compositive Standard   | N/A | N/A | High    | Unclear |
| Johnson et al.     | 2011 | USA     | 113 | CRP/ESR                                  | Knee     | Compositive Standard   | N/A | N/A | High    | Unclear |
| Randau et al.      | 2011 | Germany | 103 | CRP/WBC/IL-6/PCT                         | Knee/Hip | Compositive Standard   | N/A | N/A | High    | Unclear |
| Cipriano et al.    | 2012 | USA     | 871 | CRP/ESR/sWBC/PMN                         | Knee/Hip | Compositive Standard   | Yes | 61  | High    | Low     |

|                      |      |          |      |                                                        |          |                        |     |     |         |         |
|----------------------|------|----------|------|--------------------------------------------------------|----------|------------------------|-----|-----|---------|---------|
| Schwartz et al.      | 2012 | Germany  | 172  | CRP/ESR/sWBC/PMN                                       | Knee     | Compositive Standard   | Yes | 6   | High    | Low     |
| Parvizi et al.       | 2012 | USA      | 63   | sCRP                                                   | Knee/Hip | Compositive Standard   | Yes | 11  | High    | Unclear |
| Mihalic et al.       | 2012 | Slovenia | 206  | sWBC/PMN                                               | Hip      | Compositive Standard   | N/A | N/A | High    | Unclear |
| Wetters et al.       | 2012 | USA      | 93   | LE                                                     | Knee/Hip | Compositive Standard   | N/A | N/A | High    | Unclear |
| Zmistowski et al.    | 2012 | USA      | 150  | sWBC/PMN                                               | Knee/Hip | Compositive Standard   | N/A | N/A | High    | Unclear |
| Fink et al.          | 2012 | Germany  | 100  | CRP                                                    | Hip      | Compositive Standard   | Yes | 7   | Unclear | High    |
| Toossi et al.        | 2012 | USA      | 1856 | WBC                                                    | Knee/Hip | Compositive Standard   | N/A | N/A | High    | Low     |
| Gollwitzer et al.    | 2013 | Germany  | 35   | IL-6/sTNF-a/sIL-6/sIL-1 $\beta$                        | Knee/Hip | Compositive Standard   | Yes | N/A | High    | High    |
| Wyles et al.         | 2013 | USA      | 39   | CRP/ESR/sWBC/PMN                                       | Hip      | Intraoperative Culture | N/A | N/A | High    | Unclear |
| Dinneen et al.       | 2013 | UK       | 75   | sWBC/PMN                                               | Knee/Hip | Compositive Standard   | No  | 0   | High    | Unclear |
| Vanderstappen et al. | 2013 | Belgium  | 44   | sCRP                                                   | Knee     | Compositive Standard   | N/A | N/A | High    | Unclear |
| Alijanipour et al.   | 2013 | USA      | 1962 | CRP/ESR                                                | Knee/Hip | MSIS                   | No  | 0   | High    | Unclear |
| Miyamae et al.       | 2013 | Japan    | 81   | CRP                                                    | Knee/Hip | Compositive Standard   | No  | 0   | High    | Low     |
| El-Khier et al.      | 2013 | Egypt    | 40   | IL-6                                                   | Knee/Hip | Intraoperative Culture | N/A | N/A | High    | Low     |
| Glehr et al.         | 2013 | Austria  | 124  | CRP/WBC/IL-6/PCT                                       | Knee/Hip | Compositive Standard   | N/A | N/A | High    | Unclear |
| Bingham et al.       | 2014 | USA      | 61   | CRP/ESR/WBC/ $\alpha$ -<br>Defensin/Aspiration Culture | Knee/Hip | MSIS                   | No  | 0   | High    | High    |
| Cross et al.         | 2014 | USA      | 110  | Aspiration Culture                                     | Hip      | Intraoperative Culture | N/A | N/A | High    | Unclear |
| Ryu et al.           | 2014 | Korea    | 89   | Aspiration Culture                                     | Knee     | Compositive Standard   | N/A | N/A | High    | Unclear |
| Ronde-Oustau et al.  | 2014 | France   | 31   | CRP/sCRP                                               | Knee     | MSIS                   | Yes | 2   | High    | Unclear |
| Tetreault et al.     | 2014 | USA      | 119  | CRP/sCRP                                               | Knee/Hip | MSIS                   | Yes | 11  | High    | Unclear |
| Randau et al.        | 2014 | Germany  | 120  | CRP/WBC/IL-6/PCT/sIL-6                                 | Knee/Hip | Compositive Standard   | No  | 0   | High    | Unclear |
| Deirmengian et al.   | 2014 | USA      | 149  | sCRP/ $\alpha$ -Defensin                               | Knee/Hip | MSIS                   | Yes | N/A | High    | High    |
| Deirmengian et al.   | 2014 | USA      | 95   | sCRP/sIL-1 $\beta$ /sIL-6/ $\alpha$ -Defensin          | Knee/Hip | MSIS                   | Yes | 11  | High    | Unclear |
| Tischler et al.      | 2014 | USA      | 189  | LE                                                     | Knee/Hip | MSIS                   | N/A | N/A | Unclear | Unclear |

|                    |      |           |     |                             |          |                        |     |     |         |         |
|--------------------|------|-----------|-----|-----------------------------|----------|------------------------|-----|-----|---------|---------|
| Chalmers et al.    | 2014 | USA       | 253 | sWBC/PMN                    | Hip      | Compositive Standard   | N/A | N/A | High    | Unclear |
| Liu et al.         | 2014 | USA       | 38  | CRP/ESR                     | Knee     | MSIS                   | Yes | 8   | High    | Unclear |
| Milone et al.      | 2014 | USA       | 98  | CRP/ESR/WBC                 | Hip      | Intraoperative Culture | No  | 0   | High    | High    |
| Elgeidi et al.     | 2014 | Egypt     | 44  | CRP/ESR/IL-6/WBC            | Knee/Hip | Compositive Standard   | No  | 0   | High    | Unclear |
| Friedrich et al.   | 2014 | Germany   | 120 | CRP/WBC                     | Knee/Hip | Compositive Standard   | No  | 0   | High    | Unclear |
| Cansü et al.       | 2014 | Turkey    | 31  | CRP/ESR                     | Hip      | Intraoperative Culture | N/A | N/A | High    | Unclear |
| Claassen et al.    | 2014 | Germany   | 77  | CRP/WBC                     | Knee     | Compositive Standard   | N/A | N/A | High    | Unclear |
| Wu et al.          | 2014 | China     | 156 | CRP/ESR                     | Knee/Hip | Compositive Standard   | N/A | N/A | High    | Low     |
| Shen et al.        | 2015 | China     | 110 | Aspiration Culture          | Knee/Hip | Compositive Standard   | No  | 0   | High    | Unclear |
| Omar et al.        | 2015 | Germany   | 80  | CRP/ESR/sWBC/PMN/sCRP       | Hip      | Compositive Standard   | N/A | N/A | High    | High    |
| Buttaro et al.     | 2015 | Argentina | 76  | sCRP                        | Hip      | MSIS                   | No  | 0   | High    | Unclear |
| Shafafy            | 2015 | UK        | 103 | LE                          | Knee/Hip | IDSA                   | No  | 0   | High    | Unclear |
| Chalmers et al.    | 2015 | USA       | 433 | sWBC/PMN                    | Hip      | Compositive Standard   | N/A | N/A | High    | Unclear |
| Yuan et al.        | 2015 | China     | 71  | CRP/WBC/PCT                 | Hip      | Compositive Standard   | No  | 0   | High    | Low     |
| Hoell et al.       | 2016 | Germany   | 115 | CRP/sWBC                    | Knee/Hip | Intraoperative Culture | Yes | 5   | High    | Low     |
| Frangiamore et al. | 2016 | USA       | 78  | CRP/ESR/ $\alpha$ -Defensin | Knee/Hip | MSIS                   | N/A | N/A | High    | Unclear |
| Kwon et al.        | 2016 | USA       | 62  | CRP/ESR/sWBC/PMN            | Hip      | MSIS                   | N/A | N/A | High    | Unclear |
| Shah et al.        | 2016 | USA       | 121 | CRP/ESR/sWBC/PMN            | Knee/Hip | MSIS                   | N/A | N/A | High    | Unclear |
| Frangiamore et al. | 2016 | USA       | 90  | sTNF-a/sIL-6/sIL-1 $\beta$  | Knee/Hip | MSIS                   | Yes | 6   | High    | Unclear |
| Choi et al.        | 2016 | USA       | 138 | sWBC                        | Hip      | MSIS                   | No  | 0   | High    | Unclear |
| Boettner et al.    | 2016 | USA       | 77  | sWBC                        | Knee/Hip | Intraoperative Culture | No  | 0   | Unclear | Unclear |
| Kasperek et al.    | 2016 | USA       | 40  | $\alpha$ -Defensin          | Knee/Hip | MSIS                   | N/A | N/A | High    | Unclear |
| De Vecchi et al.   | 2016 | Italy     | 129 | sCRP/LE                     | Knee/Hip | Compositive Standard   | N/A | N/A | High    | Low     |
| Claassen et al.    | 2016 | Germany   | 32  | CRP/WBC                     | Knee     | Compositive Standard   | N/A | N/A | High    | Unclear |

|                           |      |           |      |                                                         |          |                        |     |     |      |         |
|---------------------------|------|-----------|------|---------------------------------------------------------|----------|------------------------|-----|-----|------|---------|
| Berger et al.             | 2017 | Belgium   | 121  | CRP/ESR/sWBC/PMN/ $\alpha$ -Defensin/Aspiration Culture | Knee/Hip | MSIS                   | Yes | N/A | High | High    |
| Rothenberg et al.         | 2017 | USA       | 341  | CRP/ESR/sWBC/PMN/Aspiration Culture                     | Knee/Hip | MSIS                   | N/A | N/A | High | High    |
| Pohlig et al.             | 2017 | Germany   | 20   | CRP/ESR/Aspiration Culture                              | Hip      | MSIS                   | N/A | N/A | High | Unclear |
| Fernández-Sampedro et al. | 2017 | Spain     | 495  | CRP/Aspiration Culture                                  | Knee/Hip | Compositive Standard   | N/A | N/A | High | Unclear |
| Shahi et al.              | 2017 | USA       | 195  | CRP/ESR/LE/D-Dimer                                      | Knee/Hip | MSIS                   | Yes | N/A | High | Unclear |
| Shahi et al.              | 2017 | USA       | 4662 | CRP/ESR/PMN                                             | Knee/Hip | MSIS                   | Yes | 727 | High | High    |
| Zmistowski et al.         | 2017 | USA       | 129  | CRP/ESR/sWBC/PMN                                        | Knee/Hip | Intraoperative Culture | N/A | N/A | High | Unclear |
| Li et al.                 | 2017 | China     | 93   | LE                                                      | Knee/Hip | MSIS                   | Yes | 6   | High | Unclear |
| Bonanzinga et al.         | 2017 | Germany   | 156  | $\alpha$ -Defensin                                      | Knee/Hip | ICM                    | Yes | N/A | High | Unclear |
| Gallo et al.              | 2017 | Czech     | 391  | sWBC/PMN                                                | Knee/Hip | Compositive Standard   | Yes | N/A | High | Unclear |
| Sousa et al.              | 2017 | Portugal  | 55   | sWBC/PMN/sCRP                                           | Knee/Hip | Compositive Standard   | Yes | N/A | High | Unclear |
| Higuera et al.            | 2017 | USA       | 453  | sWBC/PMN                                                | Hip      | MSIS                   | No  | 0   | High | Low     |
| Koh et al.                | 2017 | Korea     | 60   | LE                                                      | Knee     | MSIS                   | No  | 0   | High | Unclear |
| Balato et al.             | 2017 | Italy     | 51   | sWBC/PMN/ $\alpha$ -Defensin/                           | Knee     | ICM                    | No  | 0   | High | Unclear |
| Kawamura et al.           | 2017 | Japan     | 51   | sWBC/PMN/sCRP                                           | Hip      | MSIS                   | N/A | N/A | High | Low     |
| Suda et al.               | 2017 | Germany   | 30   | $\alpha$ -Defensin                                      | Knee/Hip | MSIS                   | N/A | N/A | High | Unclear |
| Wang et al.               | 2017 | China     | 63   | LE                                                      | Knee/Hip | MSIS                   | N/A | N/A | High | Unclear |
| Kheir et al.              | 2017 | USA       | 77   | LE                                                      | Knee/Hip | Intraoperative Culture | N/A | N/A | High | Low     |
| Ruangsomboon et al.       | 2017 | Thailand  | 46   | LE                                                      | Knee     | ICM                    | N/A | N/A | High | Unclear |
| Lausmann et al.           | 2017 | Germany   | 59   | LE                                                      | Knee/Hip | Compositive Standard   | N/A | N/A | High | Unclear |
| George et al.             | 2017 | Cleveland | 44   | CRP/ESR                                                 | Knee/Hip | MSIS                   | Yes | 44  | High | Unclear |
| Lindsay et al.            | 2017 | USA       | 21   | CRP/ESR                                                 | Knee/Hip | MSIS                   | N/A | N/A | High | Unclear |

|                    |      |             |      |                                                     |          |                        |     |     |         |         |
|--------------------|------|-------------|------|-----------------------------------------------------|----------|------------------------|-----|-----|---------|---------|
| Kuo et al.         | 2018 | China       | 214  | CRP/ESR/sWBC/PMN/Aspiration Culture                 | Knee/Hip | MSIS                   | N/A | N/A | Unclear | Unclear |
| Riccio et al.      | 2018 | Italy       | 73   | sWBC/ $\alpha$ -Defensin/LE/Aspiration Culture      | Knee/Hip | MSIS                   | Yes | 3   | High    | Unclear |
| De Vecchi et al.   | 2018 | Italy       | 66   | sWBC/sCRP/LE/ $\alpha$ -Defensin/Aspiration Culture | Knee/Hip | ICM                    | Yes | N/A | High    | Unclear |
| Fink et al.        | 2018 | Germany     | 116  | CRP/Aspiration Culture                              | Knee     | Intraoperative Culture | Yes | 5   | High    | Unclear |
| Fang et al.        | 2018 | China       | 71   | Aspiration Culture                                  | Knee/Hip | Compositive Standard   | Yes | 5   | High    | High    |
| Larsen et al.      | 2018 | Denmark     | 96   | Aspiration Culture                                  | Knee/Hip | MSIS                   | N/A | N/A | High    | High    |
| Morgenstern et al. | 2018 | Germany     | 142  | Aspiration Culture                                  | Knee/Hip | EBJIS                  | N/A | N/A | High    | Unclear |
| Huang et al.       | 2018 | China       | 67   | Aspiration Culture                                  | Knee/Hip | Compositive Standard   | N/A | N/A | High    | Unclear |
| Renz et al.        | 2018 | Germany     | 212  | CRP/LE/ $\alpha$ -Defensin                          | Knee/Hip | MSIS/IDSA/EBJIS        | Yes | 5   | High    | Unclear |
| Dwyer et al.       | 2018 | USA         | 205  | ESR/sWBC/PMN                                        | Knee/Hip | MSIS                   | Yes | 11  | High    | Unclear |
| Erdemli et al.     | 2018 | Turkey      | 88   | CRP/sCRP/IL-6/sIL-1 $\beta$ /sTNF-a/                | Knee/Hip | MSIS                   | Yes | 8   | High    | Unclear |
| Gallo et al.       | 2018 | Czech       | 197  | IL-6/sCRP/sIL-6                                     | Knee/Hip | MSIS                   | Yes | 19  | High    | High    |
| Shohat et al.      | 2018 | USA         | 1220 | CRP/ESR/sWBC/PMN/ $\alpha$ -Defensin                | Knee/Hip | MSIS                   | Yes | 110 | High    | High    |
| Tahta et al.       | 2018 | Turkey      | 38   | CRP/ESR/sWBC/PMN/PCT/sCRP/ $\alpha$ -Defensin       | Knee     | MSIS                   | Yes | 38  | Unclear | High    |
| Kheir et al.       | 2018 | USA         | 1095 | CRP/ESR/sWBC/PMN                                    | Knee/Hip | ICM                    | N/A | N/A | High    | High    |
| Kelly et al.       | 2018 | USA         | 39   | $\alpha$ -Defensin                                  | Knee/Hip | MSIS                   | Yes | 2   | High    | Unclear |
| Plate et al.       | 2018 | Switzerland | 109  | $\alpha$ -Defensin                                  | Knee/Hip | MSIS                   | Yes | 7   | High    | Unclear |
| Stone et al.       | 2018 | USA         | 183  | sCRP/ $\alpha$ -Defensin                            | Knee/Hip | MSIS                   | Yes | N/A | High    | Unclear |

|                          |      |             |     |                                    |          |                        |     |     |         |         |
|--------------------------|------|-------------|-----|------------------------------------|----------|------------------------|-----|-----|---------|---------|
| Zahar et al.             | 2018 | Germany     | 337 | sWBC/PMN/LE                        | Knee/Hip | MSIS                   | Yes | N/A | High    | Unclear |
| Balato et al.            | 2018 | Italy       | 167 | sWBC/PMN                           | Knee     | ICM                    | No  | 0   | High    | Unclear |
| Sigmund et al.           | 2018 | Germany     | 71  | $\alpha$ -Defensin                 | Knee/Hip | MSIS/IDSA/EBJIS        | N/A | N/A | High    | Unclear |
| De Saint Vincent et al.  | 2018 | France      | 41  | $\alpha$ -Defensin                 | Knee/Hip | MSIS                   | N/A | N/A | High    | Unclear |
| Gehrke et al.            | 2018 | Germany     | 195 | $\alpha$ -Defensin                 | Knee/Hip | MSIS                   | N/A | N/A | High    | Unclear |
| Kanwar et al.            | 2018 | USA         | 70  | $\alpha$ -Defensin                 | Knee/Hip | MSIS                   | N/A | N/A | High    | Unclear |
| Li et al.                | 2018 | China       | 204 | LE                                 | Knee/Hip | MSIS                   | N/A | N/A | High    | Unclear |
| Sebastian et al.         | 2018 | India       | 40  | CRP/ESR                            | Knee/Hip | MSIS                   | Yes | 7   | High    | Unclear |
| Stylianakis et al.       | 2018 | Greece      | 79  | CRP/ESR/WBC                        | Knee/Hip | MSIS                   | Yes | 2   | High    | Unclear |
| Sa-Ngasoongsong et al.   | 2018 | Thailand    | 32  | PCT                                | Knee/Hip | ICM                    | Yes | 2   | High    | Unclear |
| Wouthuyzen-Bakker et al. | 2018 | Canada      | 52  | CRP/ESR                            | Knee/Hip | Compositive Standard   | Yes | 4   | High    | Low     |
| Tani et al.              | 2018 | Greece      | 114 | CRP/ESR                            | Knee/Hip | Compositive Standard   | N/A | N/A | High    | Low     |
| Ettinger et al.          | 2019 | Germany     | 72  | $\alpha$ -Defensin/sIL-6/sCRP      | Knee/Hip | Intraoperative Culture | N/A | N/A | High    | Low     |
| Benedetto et al.         | 2019 | Italy       | 50  | LE                                 | Knee/Hip | MSIS                   | N/A | N/A | High    | Low     |
| Ding et al.              | 2019 | Singapore   | 70  | ESR/sWBC/PMN/ $\alpha$ -Defensin   | Knee/Hip | MSIS                   | N/A | N/A | High    | Unclear |
| Huang et al.             | 2019 | China       | 101 | CRP/ESR/D-Dimer                    | Knee/Hip | MSIS                   | No  | 0   | High    | High    |
| Kleiss et al.            | 2019 | Germany     | 202 | $\alpha$ -Defensin                 | Knee/Hip | MSIS                   | Yes | 13  | High    | Unclear |
| Lazarides et al.         | 2019 | UK          | 90  | sWBC/PMN                           | Knee/Hip | MSIS                   | Yes | 90  | Unclear | Unclear |
| Li et al.                | 2019 | China       | 439 | CRP/ESR/WBC/D-Dimer/<br>Fibrinogen | Knee/Hip | MSIS                   | No  | 0   | High    | Unclear |
| Plate et al.             | 2019 | Switzerland | 171 | sCRP                               | Knee/Hip | MSIS                   | Yes | 5   | Unclear | Unclear |

|                         |      |             |     |                                |          |                      |     |     |         |         |
|-------------------------|------|-------------|-----|--------------------------------|----------|----------------------|-----|-----|---------|---------|
| Qin et al.              | 2019 | China       | 122 | CRP/ESR/D-Dimer                | Knee/Hip | MSIS                 | No  | 0   | Unclear | High    |
| Salari et al.           | 2019 | Italy       | 72  | Calprotectin                   | Knee     | ICM                  | No  | 0   | Low     | High    |
| Schiffner et al.        | 2019 | Germany     | 108 | CRP/WBC                        | Hip      | Compositive Standard | N/A | N/A | High    | Unclear |
| Stone et al.            | 2019 | USA         | 52  | $\alpha$ -Defensin             | Knee/Hip | MSIS                 | Yes | 5   | High    | High    |
| Xiong et al.            | 2019 | China       | 80  | CRP/ESR/D-Dimer                | Knee/Hip | MSIS                 | No  | 0   | Unclear | High    |
| Xu et al.               | 2019 | China       | 318 | CRP/ESR/IL-6/D-Dimer/FDP       | Knee/Hip | MSIS                 | No  | 0   | High    | Unclear |
| Zagra et al.            | 2019 | Italy       | 119 | LE                             | Hip      | MSIS                 | Yes | N/A | High    | Unclear |
| Fu et al.               | 2019 | China       | 30  | CRP/ESR                        | Knee/Hip | MSIS                 | No  | 0   | High    | Low     |
| Xu et al.               | 2019 | China       | 102 | Fibrinogen                     | Hip      | MSIS                 | N/A | N/A | Low     | High    |
| Trotter et al.          | 2020 | UK          | 69  | Calprotectin                   | Knee/Hip | ICM                  | N/A | N/A | High    | Unclear |
| De Saint Vincent et al. | 2020 | France      | 106 | $\alpha$ -Defensin             | Knee/Hip | ICM                  | N/A | N/A | High    | Unclear |
| Fink et al.             | 2020 | Germany     | 390 | CRP                            | Knee/Hip | ICM                  | No  | 0   | High    | Low     |
| Dijkman et al.          | 2020 | Netherlands | 89  | LE                             | Knee/Hip | MSIS                 | Yes | 12  | High    | Low     |
| Wang et al.             | 2020 | China       | 63  | Aspiration Culture             | Knee/Hip | MSIS                 | N/A | N/A | High    | Unclear |
| Bin et al.              | 2020 | China       | 90  | CRP/ESR/Fibrinogen             | Knee/Hip | MSIS                 | No  | 0   | Low     | Unclear |
| Wu et al.               | 2020 | China       | 136 | CRP/ESR/Fibrinogen/D-Dimer/FDP | Knee/Hip | MSIS                 | N/A | N/A | High    | Unclear |
| Xu et al.               | 2020 | China       | 360 | CRP/ESR/Fibrinogen/PLT         | Knee/Hip | MSIS                 | No  | 0   | Low     | High    |
| Bingham et al.          | 2020 | USA         | 164 | CRP/ESR                        | Knee/Hip | MSIS                 | No  | 0   | Unclear | High    |
| Qin et al.              | 2020 | China       | 122 | CRP/ESR/D-Dimer                | Knee/Hip | MSIS                 | No  | 0   | Low     | High    |
| Qin et al.              | 2020 | China       | 50  | CRP/ESR/PMN                    | Knee/Hip | MSIS                 | No  | 0   | Low     | High    |
| Klim et al.             | 2020 | Austria     | 124 | CRP/WBC/IL-6/PCT/Fibrinogen    | Knee/Hip | MSIS                 | No  | 0   | High    | Unclear |

|                    |      |         |      |                                                                   |          |       |     |     |         |         |
|--------------------|------|---------|------|-------------------------------------------------------------------|----------|-------|-----|-----|---------|---------|
| Paziuk et al.      | 2020 | USA     | 4939 | CRP/ESR/PVR                                                       | Knee/Hip | MSIS  | No  | 0   | High    | Low     |
| Pannu et al.       | 2020 | USA     | 111  | D-Dimer                                                           | Knee/Hip | ICM   | N/A | N/A | High    | High    |
| Ackmann et al.     | 2020 | Germany | 119  | CRP/D-Dimer/IL-6                                                  | Knee/Hip | MSIS  | No  | 0   | High    | Unclear |
| Fang et al.        | 2020 | China   | 38   | Aspiration Culture                                                | Knee/Hip | MSIS  | No  | 0   | Low     | High    |
| Wang et al.        | 2020 | China   | 157  | CRP/ESR/D-Dimer/Fibrinogen/FDP                                    | Knee/Hip | MSIS  | No  | 0   | Unclear | High    |
| Zhang et al.       | 2020 | China   | 63   | Calprotectin                                                      | Knee/Hip | MSIS  | No  | 0   | Low     | High    |
| Levent et al.      | 2021 | Germany | 260  | CRP/PMN/sWBC/LE/ $\alpha$ -Defensin                               | Knee/Hip | ICM   | N/A | N/A | High    | Unclear |
| Yu et al.          | 2021 | China   | 139  | CRP/IL-6                                                          | Knee/Hip | MSIS  | N/A | N/A | High    | Low     |
| Yu et al.          | 2021 | China   | 130  | LE/ $\alpha$ -Defensin                                            | Knee/Hip | EBJIS | N/A | N/A | High    | Low     |
| Deirmengian et al. | 2021 | USA     | 228  | CRP/ESR/sWBC/PMN/ $\alpha$ -Defensin                              | Knee/Hip | MSIS  | Yes | N/A | Low     | High    |
| Praz et al.        | 2021 | France  | 152  | CRP                                                               | Knee/Hip | MSIS  | N/A | N/A | Low     | Unclear |
| Grzelecki et al.   | 2021 | Poland  | 133  | CRP/ESR/D-Dimer                                                   | Knee/Hip | ICM   | No  | 0   | High    | Unclear |
| Chisari et al.     | 2021 | USA     | 259  | CRP/ESR/ LE /Fibrinogen/<br>sCRP/sWBC/D-Dimer/ $\alpha$ -Defensin | Knee/Hip | ICM   | N/A | N/A | High    | High    |
| Sahin et al.       | 2021 | Turkey  | 62   | CRP/ESR/PVR                                                       | Knee/Hip | ICM   | No  | 0   | High    | Unclear |
| Grzelecki et al.   | 2021 | Poland  | 195  | Calprotectin                                                      | Knee/Hip | ICM   | Yes | 25  | High    | Unclear |
| Wang et al.        | 2021 | China   | 93   | CRP/ESR/sIL-1 $\beta$ /PMN                                        | Knee/Hip | MSIS  | No  | 0   | Unclear | High    |
| Yin et al.         | 2021 | China   | 35   | CRP/ESR/IL-6/PCT/D-Dimer/<br>Aspiration Culture                   | Knee/Hip | MSIS  | No  | 0   | High    | Unclear |
| Xu et al.          | 2021 | China   | 65   | CRP/ESR/IL-6/FDP/D-Dimer                                          | Knee/Hip | ICM   | Yes | N/A | High    | High    |
| Sigmund et al.     | 2021 | Austria | 176  | CRP/WBC/PMN/NLR/PVR/<br>Fibrinogen                                | Knee/Hip | EBJIS | N/A | N/A | High    | Low     |

|                 |      |                  |     |                                                                       |          |           |     |     |         |         |
|-----------------|------|------------------|-----|-----------------------------------------------------------------------|----------|-----------|-----|-----|---------|---------|
| Huang et al.    | 2021 | China            | 149 | CRP/ESR/PVR/Fibrinogen/D-Dimer                                        | Knee/Hip | MSIS      | Yes | 64  | High    | Low     |
| Qiao et al.     | 2021 | China            | 210 | CRP/ESR/PVR/Fibrinogen/<br>D-Dimer/FDP/PLT                            | Knee/Hip | MSIS      | N/A | N/A | Low     | Unclear |
| Wang et al.     | 2021 | China            | 97  | CRP/ESR/sCRP/PMN                                                      | Knee/Hip | MSIS      | No  | 0   | Unclear | High    |
| Ivy et al.      | 2021 | USA              | 99  | $\alpha$ -Defensin                                                    | Knee/Hip | MSIS/IDSA | N/A | N/A | High    | Unclear |
| Shohat et al.   | 2021 | USA              | 122 | LE/ $\alpha$ -Defensin                                                | Knee/Hip | ICM       | N/A | N/A | High    | High    |
| Abdo et al.     | 2021 | Brazil           | 53  | $\alpha$ -Defensin                                                    | Knee     | MSIS      | Yes | 12  | High    | Low     |
| Li et al.       | 2021 | China            | 50  | CRP/ESR/PCT/ $\alpha$ -Defensin/D-Dimer                               | Knee/Hip | MSIS      | No  | 0   | Low     | High    |
| Tirumala et al. | 2021 | USA              | 538 | CRP/ESR/PMN/sWBC/PLT/PVR                                              | Knee     | ICM       | N/A | N/A | High    | Unclear |
| Warren et al.   | 2021 | USA              | 123 | Calprotectin                                                          | Knee     | MSIS      | N/A | N/A | Low     | High    |
| Ye et al.       | 2021 | China            | 158 | CRP/ESR/NLR                                                           | Knee/Hip | MSIS      | No  | 0   | Low     | Unclear |
| Klemt et al.    | 2022 | USA              | 464 | CRP/ESR/PMN/sWBC/MLR/NLR/<br>PLR/PVR                                  | Hip      | MSIS      | No  | 0   | Low     | High    |
| Baker et al.    | 2022 | USA              | 588 | CRP/ESR/PMN/sCRP/sWBC/<br>$\alpha$ -Defensin                          | Knee/Hip | ICM       | No  | 0   | High    | Low     |
| Kuo et al.      | 2022 | Taiwan,<br>China | 76  | CRP/ESR/D-Dimer/sWBC/LE/<br>$\alpha$ -Defensin/PMN/Aspiration Culture | Knee/Hip | ICM       | N/A | N/A | High    | Low     |
| Grassi et al.   | 2022 | Italy            | 93  | Calprotectin                                                          | Knee     | ICM       | N/A | N/A | Low     | High    |
| Shang et al.    | 2022 | China            | 206 | CRP/ESR/PLT/PCT/PVR                                                   | Knee/Hip | MSIS      | No  | 0   | High    | Unclear |
| Liu et al.      | 2022 | China            | 58  | CRP/ESR/PCT/D-Dimer                                                   | Knee/Hip | MSIS      | N/A | N/A | High    | Low     |
| Xu et al.       | 2022 | China            | 543 | CRP/ESR//Fibrinogen/IL-6/<br>PLT/MLR/NLR/PLR                          | Knee/Hip | ICM       | N/A | N/A | High    | High    |

|                           |      |       |     |                                                        |          |      |     |     |         |         |
|---------------------------|------|-------|-----|--------------------------------------------------------|----------|------|-----|-----|---------|---------|
| Huang et al.              | 2022 | China | 99  | CRP/ESR/PMN                                            | Knee/Hip | MSIS | No  | 0   | High    | Low     |
| Jiao et al.               | 2022 | China | 115 | CRP/ESR/NLR                                            | Knee/Hip | MSIS | No  | 0   | Low     | Unclear |
| Qin et al.                | 2022 | China | 70  | CRP/ESR/IL-6/sIL-6/PMN/D-Dimer                         | Knee/Hip | MSIS | Yes | 30  | Unclear | High    |
| Xu et al.                 | 2022 | China | 63  | CRP/ESR/Fibrinogen/NLR                                 | Knee/Hip | ICM  | N/A | N/A | High    | High    |
| Fernandez-Sampedro et al. | 2022 | Spain | 180 | CRP/ESR/D-Dimer                                        | Knee/Hip | IDSA | No  | 0   | Unclear | Low     |
| Chen et al.               | 2022 | China | 186 | CRP/ESR/D-Dimer/FDP/PVR/PLT                            | Knee/Hip | MSIS | N/A | N/A | High    | Low     |
| Chen et al.               | 2022 | China | 52  | ESR/FDP/D-Dimer/Fibrinogen                             | Knee/Hip | MSIS | N/A | N/A | Unclear | High    |
| Maimaiti et al.           | 2022 | China | 246 | CRP/ESR/WBC/MLR/NLR/PLR/<br>PVR/D-Dimer/Fibrinogen/PLT | Knee/Hip | MSIS | No  | 0   | Low     | High    |

- a. PLT: platelet count; NLR: neutrophil to lymphocyte ratio; MLR: monocyte to lymphocyte ratio; PLR: platelet to lymphocyte ratio; PVR: platelet to mean platelet volume ratio; FDP: fibrin degradation product; sWBC: synovial WBC; sCRP: synovial CRP; sIL-6: synovial IL-6; sTNF- $\alpha$ : synovial TNF- $\alpha$ ; sIL-1 $\beta$ : synovial IL-1 $\beta$ ; PCT: serum procalcitonin; LE: leucocyte esterase; MSIS: the Musculoskeletal Infection Society criteria; IDSA: the Infectious Diseases Society of America criteria; EBJS: European Bone and Joint Infection Society criteria; ICM: the International Consensus Meeting (ICM); Compositive Standard: Study-defined comprehensive PJI diagnostic evaluation criteria; IA: inflammatory arthritis; QUADAS-2: The Quality Assessment of Diagnostic Accuracy Studies 2.
- b. The articles report no information of the IA patients included.
- c. The articles report no information of the specific number of the IA patients included.
